# Supplementary material for: Greening School Meals: Sustainability Analysis and CO₂e Mitigation Potential in Spanish Publicly Funded Primary Schools
Source: Research Square preprint supplement (doi:10.21203/rs.3.rs-8723135/v1), 2026-02-05
Supplement: Supplementary file 1 [file 9afe02bf705e4ad705541767.xlsx]

## Sheet: Sustainability
comunidad	School - place (month)	tipo	dias_letivos_mes	dias_com_alimento_animal	dias_com_carne	dias_plant_based	pct_dias_com_alimento_animal	pct_dias_com_carne	dias_com_duas_carnes	Pratos_boi_decomposto	Pratos_boi_principal	Pratos_porco_decomposto	Pratos_porco_principal	Pratos_aves_decomposto	Pratos_aves_principal	Pratos_peixes_mariscos_decomposto	Pratos_peixes_mariscos_principal	Pratos_outras_carnes_decomposto	Pratos_outras_carnes_principal	Pratos com_lacteos	Pratos com_ovos	observacoes	Dishes with meat			Total boi/gramas		Total porco/gramas		Total ave/gramas		Total peixe/gramas		Quantidade seafood		Total proporcional dia boi e porco	Total proporcional dia ave e peixe	Total proporcional/dia todas carnes		Limite de emissões dos 71,5 gramas (considerando a proporção boi/porco 30/70%) por menu/aluno
ANDALUZIA	CEIP Bernardo Barco - Sevilla (Outubro)	Público	22	22	22	0	1	1	13	3	1	13	3	5	4	2	6	0	0	13	11		37			175	175	625	625	525	525	710	710	1	1.54545	36.3	56.1	92.4		1,23 kg co2e
	CEIP Borbolla - Sevilha (março/abril)	Público	20	20	16	0	1	0.8	5	1	1	3	1	0	2	3	8	0	0	3	7		19			125	125	175	175	200	200	955	955	2	3.85	15	57.75	72.75		1226 g
	CEIP García Lorca - Málaga (Set/Out)	Público	18	18	10	0	1	0.56	1	0	0	1	2	0	5	0	4	0	0	7	7	Mediterranea	12			0	0	225	225	500	500	440	440	0	4.176	12.5	52.2	64.7	M	Limite boi/porco: 558 g CO₂e
	CEIP Hernán Ruiz - Cordoba (Fev/Março)	Público	20	20	13	0	1	0.65	0	1	1	0	2	3	2	1	4	0	0	6	6	Mediterranea	14			125	125	200	200	275	275	465	465	1	2.27692	16.25	37	53.25	M	Limite frango/peixe: 668 g Co2e
	CEIP Palacios Rubio - La Carolina - Jaen (Out)	Público	23	23	18	0	1	0.78	7	6	1	5	2	2	5	4	4	0	0	5	7		29			250	250	325	325	550	550	540	540	1	1.896	25	47.4	72.4
	CEIP Alfonso X El Sabio - Jerez (1o trimestre)	Público	20	20	18	2	1	1	8	2	2	6	2	1	4	5	6	0	0	6	7		28	1 frango, 1 peixe, 1 porco menus de 1/3		250	250	335	350	410	425	770	785	2	2.01709	29.25	59	88.25
	CEIP Maestro José Fuentes - Sevilla (Nov-Dec)	Público	20	20	15	0	1	0.75	4	0	0	0	1	2	3	8	5	0	0	4	8		19			0	0	100	100	350	350	750	750	1	11	5	55	60
	Colegio Andalucía - Malaga (Out)	Concertado	23	23	17	0	1	0.74	2	0	0	0	1	3	4	4	7	0	0	7	18		19			0	0	100	100	475	475	870	870	0	13.6047	4.3	58.5	62.8
	Colegio Antonio Gala - Sevilla (Out)	Concertado	23	23	15	0	1	0.65	3	3	1	5	0	3	2	2	8	0	0	7	11		24	(2 porcos, 2 bois e 2 frangos menos de 1/3)		145	175	95	125	245	275	930	930	1	4.91346	10.4	51.1	61.5
	Colegio Compañía de María - Granada (Out)	Concertado	22	22	19	0	1	0.86	6	3	1	5	2	0	2	3	9	0	0	11	7	Aramark	25			175	175	325	325	200	200	1065	1065	1	2.53304	22.7	57.5	80.2	Ar
	Colegio Diocesano Virgen de Gracia - Granada (Out)	Concertado	22	22	21	0	1	0.95	12	3	1	7	1	3	3	6	9	0	0	15	13	Aramark	33			175	175	275	275	375	375	1140	1140	2	3.37745	20.4	68.9	89.3	Ar
	Colegio La Milagrosa - Córdoba (Out)	Concertado	23	23	23	0	1	1	10	0	1	4	2	9	5	5	10	0	0	0	0		36			100	100	300	300	725	725	1225	1225	1	4.86782	17.4	84.7	102.1
	Colegio La Salle - Córdoba (Out)	Concertado	21	21	19	0	1	0.86	6	2	2	8	2	1	3	2	6	0	0	8	6	Aramark	26			250	250	400	400	325	325	710	710	1	1.59547	30.9	49.3	80.2	Ar
	Colegio Nuestra Señora de Loreto - Malaga Andalucia (Out)	Concertado	18	18	16	0	1	0.89	6	2	1	2	5	2	3	3	4	0	0	13	14	Seral	22			150	150	550	550	350	350	515	515	1	1.23969	38.8	48.1	86.9	Sa
	Colegio Regina Mundi - Granada (Outubro)	Concertado	22	22	21	0	1	0.95	7	1	1	5	5	2	1	7	7	0	0	14	14	Seral	29			125	125	625	625	150	150	945	945	2	1.46471	34	49.8	83.8	Sa
ARAGÃO	CEIP Arcosur - Zaragoza (Outubro)	Público	21	21	18	0	1	0.85	4	1	0	4	4	1	5	1	6	0	0	6	6	Aramark	22			25	25	500	500	525	525	685	685	1	2.304	25	57.6	82.6	Ar
	CEIP Ciudad de Zaragoza - Zaragoza (Outubro)	Público	21	21	20	0	1	0.95	10	5	1.5	7	2.5	3	5	3	6	0	0	14	4		33			275	275	425	425	575	575	735	735	0	1.87387	33.3	62.4	95.7
	CEIP Cortes de Aragón - Zaragoza (Outubro)	Público	21	21	16	0	1	0.76	1	1	1	1	1	1	5	1	6	0	0	5	7	Aramark	17			125	125	125	125	525	525	685	685	0	4.84034	11.9	57.6	69.5	Ar
	Colegio Público Doctor Azúa - Zaragoza (Outubro)	Público	21	21	21	0	1	1	8	1	1	5	2	2	5	5	8	0	0	5	4		29			125	125	325	325	550	550	1005	1005	1	3.45794	21.4	74	95.4
	Colegio Calasanz - Zaragoza (Outubro)	Concertado	21	21	20	0	1	0.95	8	1	1	7	4	3	3	3	6	0	0	17	19	Seral	28			125	125	575	575	375	375	735	735	2	1.58859	33.3	52.9	86.2	Sa
	Colegio Salesianos - Huesca (Outubro)	Concertado	22	22	20	0	1	0.91	2	0	2	5	0	0	6	0	9	0	0	11	11		22			200	200	125	125	600	600	990	990	0	4.91837	14.7	72.3	87
	Colegio Santa Ana Monzón - Huesca (Outubro	Concertado	22	19	15	3	0.86	0.68	4	1	1	3	3	1	3	1	6	0	0	5	6	Serunion	19			125	125	375	375	325	325	685	685	0	2.02203	22.7	45.9	68.6	Sru
ASTURIAS	CEIP Cabuenes - Asturias (25-26)	Público	20	20	19	0	1	0.95	7	2	2	5	6	0	2	3	6	0	0	6	3		26			250	250	725	725	200	200	735	735	1	0.958974	48.75	46.75	95.5
	CEIP La Vallina - Asturias (Outubro)	Público	22	18	14	3	0.82	0.63	1	2	1	1	0	0	5	1	5	0	0	4	3	Ausolan	15			150	150	25	25	500	500	575	575	1	6.1125	8	48.9	56.9	Au
	Colegio Público “Manuel Martínez Blanco” - Gijon (Março)	Público	19	19	18	0	1	0.95	8	3	2.5	6	1.5	2	2	2	6	0	0	4	4	Serunion	25	1 peixe e um frango dividindo o mesmo prato, ou seja, menos da metade pra cada um (paella)		325	325	300	300	240	250	700	710	1	1.50456	32.9	49.5	82.4	Sru
	CP Lugo de Llanera - Asturias (Out)	Público	23	23	20	0	1	0.87	5	4	0.5	5	3.5	1	4	1	7	0	0	6	4		26			150	150	475	475	425	425	795	795	0	1.94853	27.2	53	80.2
	Colegio FEC San Manuel-Naranco - Oviedo (Setembro)	Concertado	22	22	17	0	1	0.77	5	2	1	3	3	1	4	0	8	0	0	6	5	Ausolan	22			150	150	375	375	425	425	880	880	0	2.48117	23.9	59.3	83.2	Au
	Colegio Gesta – Oviedo (Outubro)	Concertado	23	23	20	0	1	0.87	5	4	0.5	5	3.5	1	4	1	7	0	0	6	4		26			150	150	475	475	425	425	795	795	0	1.94853	27.2	53	80.2
	Colegio de La Assuncion - Asturias (Outubro)	Concertado	22	22	16	0	1	0.73	6	2	1	3	5	2	4	0	5	0	0	6	6	Ausolan	22			150	150	575	575	450	450	550	550	0	1.37785	32.95	45.4	78.3	Au
BALEARES	CEIP Aina Moll i Marquès - Maiorca (Out)	Público	23	23	21	0	1	0.91	3	2	0	1	2	2	6	5	8	0	0	7	12		26	1 frango e 1 boi menos da metade cada um		40	50	225	225	640	650	1005	1005	4	6.21739	11.5	71.5	83
	CEIP Es Vivero - Maiorca (Out)	Público	23	23	21	0	1	0.91	3	2	0	1	2	2	6	5	8	0	0	7	12		26	1 frango e 1 boi menos da metade cada um		40	50	225	225	640	650	1005	1005	4	6.21739	11.5	71.5	83
	CEIP S'albufera - Maiorca (Out)	Público	23	23	20	0	1	0.87	2	0	1	2	3	0	7	1	8	0	0	12	12		22			100	100	350	350	700	700	905	905	1	3.57949	19.5	69.8	89.3
	CEIP Son Basca - Maiorca (Out)	Público	23	23	22	0	1	0.96	8	2	2	2	2	4	6	6	7	0	0	10	15		31	1 frango e 1 peixe menos da metade cada um		250	250	250	250	700	700	920	920	3	3.59184	19.6	70.4	90
	CIDE – Centre Internacional d’Educació - Palma (OUT)	Concertado	22	22	21	0	1	0.95	6	1	1	4	1	2	7	5	8	1	0	12	12		30	(1 frango, 1 porco, e 1 coelho menos do que 1/3, junto com arroz) (1 porco e 1 peixe menos do que metade, junto com arroz)		125	125	175	200	745	750	995	1005	2	5.81618	13.6	79.1	92.5
	Col·legi Fray Joan Ballester - Maiorca (Out)	Concertado	23	23	18	0	1	0.78	3	2	1.5	6	2.5	1	5	0	6	1	0	9	4	Scolarest	25	(1 frango, 1 porco, e 1 coelho menos do que 1/3, junto com arroz)		200	200	385	385	520	525	660	660	0	2.01969	25.4	51.3	76.7	Sco
	Colegio Nuestra Senora de la consolacion - Menorca (Maio)	Concertado	21	21	18	0	1	0.81	7	1	2	5	2	1	4	2	8	0	0	14	11	Seral	25			225	225	325	325	425	425	930	930	2	2.46183	26.2	64.5	90.7	Sa
CANARIAS	CEIP Antonio Zerolo - Canarias (Out)	Público	23	23	21	0	1	0.91	5	0	0	3	5	2	6	5	6	0	0	7	10		27	(1 peixe e 1 porco menos da metade)		0	0	565	575	650	650	775	785	1	2.52033	24.6	62	86.6
	CEIP Pintor Nestor - Canarias (Out)	Público	23	23	19	0	1	0.83	2	3	1	6	1	3	4	1	4	0	0	8	14		23	(1 porco e 1 boi menos da metade) (1 frango e 1 boi menos da metade)		155	175	240	250	465	475	465	465	0	2.34884	17.2	40.4	57.6
	CEIP Salvador Manrique de Lara - La palma gran Canarias (Maio)	Público	18	17	14	1	0.94	0.78	3	2	1	2	1	2	3	4	3	0	0	7	10		18	1 boi e 1 porco menos da metade		140	150	140	150	350	350	430	430	0	2.79355	15.5	43.3	58.8
	CEIP San Fernando - Tenerife (1o trimestre)	Público	20	18	16	2	0.9	0.8	4	4	2	4	1	3	2	2	4	0	0	4	12		22	(1 boi e 1 frango menos da metade)(1 boi e 1 porco menos da metade)		280	300	190	200	265	275	490	490	0	1.60638	23.5	37.75	61.2
	CEIP Yaiza Lanzarote - Canarias (Out)	Público	22	22	17	0	1	0.77	7	3	1	2	1	5	6	3	5	0	0	7	11		26	(1 porco e 1 boi menos da metade) (1 frango e um boi menos da metade)		155	175	140	150	715	725	625	625	1	4.54478	13.4	60.9	74.3
	Colegio Echeyde - Canarias (Out)	Concertado	23	23	19	0	1	0.83	5	4	1	6	2	1	5	3	5	0	0	11	8		27	(3 bois e 3 porcos menos da metade)		170	200	320	350	525	525	625	625	1	1.59744	31.3	50	71.3
	Colegio La Milagrosa - Tenerife (Out)	Concertado	23	23	22	0	1	0.96	3	2	0	3	3	4	4	5	5	0	0	8	13		26	1 porco e 1 frango menos da metade		50	50	365	375	490	500	675	675		2.81111	18	50.6	68.6
	Colegio Norte - Canarias (Jan-Março)	Concertado	20	20	18	0	1	0.9	3	1	0.5	6	0.5	5	5	1	4	0	0	4	4	Scolarest	23	(1 porco e 1 boi menos da metade)(1 frango e 1 porco menos da metade)		65	75	180	200	615	625	465	465		4.40816	12.25	54	66.25	Sco
	Colegio Rodríguez Campos - Canarias (Out)	Concertado	23	23	18	0	1	0.78	3	1	1	3	3	2	3	2	7	0	0	6	5		22			125	125	375	375	350	350	820	820	1	2.24229	22.7	50.9	73.6
CANTABRIA	CEIP Cervantes - Torrelavega (Outubro)	Público	18	18	15	0	1	0.83	6	2	0.5	3	3.5	2	3	1	6	0	0	5	5	Ausolan	21			100	100	425	425	350	350	685	685	0	1.97595	29.1	57.5	86.6	Au
	CEIP Ricardo Macías Picavea - Santoña(Out)	Público	23	23	20	0	1	0.87	3	1	1.5	2	3.5	2	6	1	6	0	0	10	4		23			175	175	400	400	650	650	685	685	1	2.32	25	58	83
	CEIP Ramón Pelayo - Santander(Out)	Público	18	18	16	0	1	0.89	2	3	0	2	1	2	3	0	7	0	0	9	12		18			75	75	150	150	350	350	770	770	0	4.976	12.5	62.2	74.7
	CEIP Sardinero - Santander (Out)	Público	18	18	15	0	1	0.83	6	3	0	4	3	2	3	1	6	0	0	5	5	Ausolan	22			75	75	400	400	350	350	685	685	0	2.17803	26.4	57.5	83.9	Au
	Colegio Calasanz - Santander (Set)	Concertado	16	16	14	0	1	0.87	5	3	1	4	0	1	3	0	7	0	0	6	9		19			175	175	100	100	325	325	770	770	0	3.97674	17.2	68.4	85.6
	Colegio Sagrado Corazón Esclavas - Santander (Out)	Concertado	18	18	16	0	1	0.89	5	0	3	5	1	0	4	1	7	0	0	4	3	Serunion	21			300	300	225	225	400	400	795	795	1	2.27397	29.2	66.4	95.6	Sru
	Colegio San José - La Mennais Reinosa (out)	Concertado	18	18	17	0	1	0.94	2	1	2	4	2	0	3	0	7	0	0	4	4		19			225	225	300	300	300	300	770	770	0	2.03425	29.2	59.4	86.6
CASTELA E LEAO	CEIP Benito León - Leon (Out)	Público	21	21	19	0	1	0.9	11	4	3	9	2	1	3	0	8	0	0	6	4	Serunion	30			400	400	425	425	325	325	880	880	2	1.46056	39.3	57.4	96.7	Sru
	CEIP Camino del Norte - Leon (Out)	Público	21	21	20	0	1	0.95	7	2	3.5	8	1.5	1	3	0	8	0	0	5	5	Serunion	27			400	400	350	350	325	325	880	880	2	1.60784	35.7	57.4	93.1	Sru
	CEIP Ignacio Martín-Baró - Valladolid (Out)	Público	21	21	20	0	1	0.95	7	2	3.5	8	1.5	1	3	0	8	0	0	5	5	Serunion	27			400	400	350	350	325	325	880	880	2	1.60784	35.7	57.4	93.1	Sru
	CEIP RÍO ARLANZÓN - Burgos (Out)	Público	21	21	18	0	1	0.86	3	1	1.5	5	3.5	0	3	1	6	0	0	8	4	Ausolan	21			175	175	475	475	300	300	685	685	1	1.5178	30.9	46.9	77.8	Au
	CEIP La Granja - Leon (Set)	Público	17	17	14	0	1	0.82	7	2	3	4	2	0	2	1	7	0	0	4	3	Serunion	21			350	350	300	300	200	200	795	795	1	1.53403	38.2	58.6	96.7	Sru
	Colegio Ave María - Valladolid (Nov)	Concertado	20	19	15	1	0.95	0.75	6	6	0.5	3	4.5	2	3	0	4	0	0	6	5		23			200	200	525	525	350	350	440	440	0	1.08966	36.25	39.5	75.75
	Colegio Blanca de Castilla - Burgos (Out)	Concertado	21	21	19	0	1	0.9	1	0	2	4	2	0	5	0	7	0	0	9	3	Ausolan	20			200	200	300	300	500	500	770	770	3	2.54202	23.8	60.5	84.3	Au
	Colegio Ntra. Sra. del Carmen (Maio)	Concertado	19	19	18	0	1	0.95	4	1	4	3	3	0	6	0	5	0	0	6	2		22			425	425	375	375	600	600	550	550	0	1.43705	42.1	60.5	102.6
	Colegio Sagrada Familia - Valladolid (Out)	Concertado	20	19	17	1	0.95	0.85	5	2	3	5	3	1	2	1	7	0	0	6	3		24	1 porco e 1 peixe menos que a metade		350	350	415	425	225	225	785	795	0	1.32026	38.25	50.5	88.75
	Colegio San Juan Bosco - Salamanca (Set)	Concertado	16	16	16	0	1	1	3	2	1	5	3	1	2	0	6	0	0	6	3	Serunion	20			150	150	425	425	225	225	660	660	0	1.54039	35.9	55.3	91.2	Sru
Castilla la Mancha	CEIP Fernando de Rojas - Toledo (out)	Público	22	22	19	0	1	0.86	2	3	2	2	2	0	3	0	9	0	0	3	5	Mediterranea	21			275	275	250	250	300	300	990	990	0	2.45188	23.9	58.6	82.5	M
	CEIP Parque de la Muñeca - Guadalajara (Nov)		19	19	15	0	1	0.78	3	5	0	2	2	0	3	2	6	0	0	4	4	Mediterranea	20			125	125	250	250	300	300	710	710	0	2.68421	20.9	56.1	77	M
	CEIP Santisimo Cristo de las Injurias - Toledo (Out)	Público	22	22	19	0	1	0.86	2	3	2	2	2	0	3	0	9	0	0	3	5	Mediterranea	21			275	275	250	250	300	300	990	990	0	2.45188	23.9	58.6	82.5	M
	CEIP Parque Sur - Albacete (Out)	Público	22	22	18	0	1	0.82	3	2	0	0	2	2	4	3	9	0	0	5	11		22			50	50	200	200	450	450	1065	1065	2	6.04386	11.4	68.9	80.3
	CEIP La Ilustracion - Albacete (Nov)	Público	18	18	15	0	1	0.83	3	1	0	0	2	1	4	4	7	0	0	4	5		19			25	25	200	200	425	425	870	870	2	5.752	12.5	71.9	84.4
	Colegio Maristas Santa Maria - Toledo (Nov)	Concertado	19	19	16	0	1	0.84	8	2	0	6	2	0	5	1	7	0	0	8	4		23			50	50	350	350	500	500	795	795	1	3.23753	21.05	68.15	89.2
	Colegio Alborada - Castilla-La Mancha (Out)	Concertado	21	20	16	1	0.95	0.76	3	4	0.5	3	1.5	2	5	0	5	0	0	5	4	Scolarest	21	2 bois e 2 frangos menos da metade		130	150	225	225	530	550	550	550		3.04142	16.9	51.4	68.3	Sco
	Colegio Escuelas Pias - Albacete (Out)	concertado	22	22	20	0	1	0.91	6	4	3	8	1	3	4	0	8	0	0	7	11		31	2 porcos, 2 bois e 2 frangos menos de 1/3		370	400	270	300	445	475	880	880	0	1.85231	32.5	60.2	92.7
CATALUNIA	CEIP Marcel·lí Domingo - Tarragona (Out)	Público	23	20	17	3	0.87	0.74	3	1	1	2	3	3	6	0	5	0	0	4	4		21	1 porco e 1 boi menos da metade		115	125	340	350	675	675	550	550	0	2.70202	19.8	53.5	73.3
	ESC Font del Roure -Barcelona (Out)	Público	22	20	16	2	0.91	0.73	0	1	0	3	3	0	4	1	4	1	0	4	5	Mediterranea	17	1 porco e 1 coelho menos da metade		25	25	365	375	415	400	465	465		2.25989	17.7	40	57.7	M
	Escola Alba - Lerida (Out)	Público	20	19	13	1	0.95	0.65	1	0	2	0	2	1	4	2	3	0	0	10	8		14			200	200	200	200	425	425	380	380		2.0125	20	40.25	60.25
	Escola Bàrkeno - Barcelona (Out)	Público	22	21	18	1	0.95	0.82	1	0	1.5	4	1.5	0	5	1	6	0	0	7	5		19			150	150	250	250	500	500	685	685		2.96154	18.2	53.9	72.1
	Escola Ronçana - Barcelona (Out)	Público	23	20	16	3	0.87	0.7	1	1	2	2	3	0	4	0	5	0	0	10	4		17			225	225	350	350	400	400	550	550		1.652	25	41.3	66.3
	Escola Ruiz Amado - Girona (Out)	Público	23	23	18	0	1	0.78	0	1	3	1	2	0	7	1	3	0	0	6	5		18			325	325	225	225	700	700	355	355		1.9205	23.9	45.9	69.8
SET	Escola Sant Salvador - Tarragona (SET)	Público	15	15	13	0	1	0.87	4	0	3	4	1	1	2	0	6	0	0	2	2	Aramark	17			300	300	200	200	225	225	660	660	0	1.77177	33.3	59	92.3	Ar
	Escola Splai - Barcelona (Out)	Público	22	21	17	1	0.95	0.77	1	0	3	2	3	0	6	1	4	0	0	7	4		19			300	300	350	350	600	600	465	465		1.64068	29.5	48.4	77.9
	Colegio Sil - Barcelona (Out)	Concertado	22	18	14	4	0.82	0.64	3	1	0	3	4	3	3	0	3	0	0	7	7	Aramark	17			25	25	475	475	375	375	330	330		1.40969	22.7	32	54.7	Ar
	Colegio Xaloc - Barcelona (Out)	Concertado	23	23	20	0	1	0.87	5	2	1	4	4	2	6	3	4	0	0	11	10		26			150	150	500	500	650	650	515	515	0	1.79787	28.2	50.7	78.9
	Collegi Claret - Sabadell(Out)	Concertado	23	22	19	1	0.96	0.83	2	2	1	1	0	4	7	2	5	0	0	6	5	Mediterranea	22	1 boi e 1 frango menos do que a metade		140	150	25	25	790	800	600	600		8.50704	7.1	60.4	67.5	M
	Col·legi Escolàpies - Sabadell (Out)	Concertado	23	23	20	0	1	0.87	6	1	2	6	4	3	4	0	8	0	0	5	3		28	2 porcos e 2 frangos menos da metade		225	225	530	550	455	475	880	880	0	1.76829	32.8	58	90.8
	Col·legi Mater Salvatoris - Lleida (Out)	Concertado	22	22	22	0	1	1	2	1	2	0	8	3	5	0	4	0	0	6	0		23			225	225	800	800	575	575	440	440	1	0.98927	46.6	46.1	92.7
	Escola FEDAC - Lleida (Out)	Concertado	22	22	19	0	1	0.86	1	0	1.5	3	1.5	0	6	1	7	0	0	6	4		20			150	150	225	225	600	600	795	795	2	3.72941	17	63.4	78.2
	Saint Nicholas School - Barcelona (Out)	Concertado	22	21	17	1	0.95	0.77	5	0	2.5	2	2.5	1	6	4	4	0	0	8	6	Serunion	22			250	250	300	300	625	625	540	540	0	2.12	25	53	78	Sru
COM. VALENCIANA	CEIP Benalua - Alicante (Out)	Público	21	21	18	0	1	0.86	4	1	1	1	4	0	5	3	7	0	0	0	5		22			125	125	425	425	500	500	845	845	3	2.44275	26.2	64	90.2
	CEIP Cervantes - Ibi (Outubro)	Público	21	21	20	0	1	0.95	6	1	2	5	2	2	2	7	5	0	0	15	12	Serunion	26			225	225	325	325	250	250	725	725	2	1.77099	26.2	46.4	72.6	Sru
	CEIP Comunitat Valenciana - Valencia (Out)	Público	21	21	20	0	1	0.95	6	2	1	8	3	1	4	2	7	0	0	21	10		28	2 porcos e 2 bois menos da metade		130	150	480	500	425	425	820	820	4	2.04483	29	59.3	88.3
	CEIP El Castell - Castellon (Out)	Público	21	21	19	0	1	0.9	7	0	1	8	1	2	4	4	7	0	0	15	28		27	1 peixe e 1 porco menos da metade		100	100	290	300	450	450	860	870	1	3.35484	18.6	62.4	81
	CEIP Hispanidad - Elche (Out)	Público	21	21	18	0	1	0.86	4	0	0	5	4	1	5	1	6	0	0	6	6	Aramark	22			0	0	525	525	525	525	685	685	1	2.304	25	57.6	82.6	Ar
	CEIP Luis Vives - Elche (Out)	Público	22	22	18	0	1	0.82	5	0	1.5	6	2.5	3	5	1	5	1	0	9	5		25	1 frango e 1 coelho menos da metade e 1frango e 1 porco menos da metade		150	150	490	400	570	575	575	575	1	1.78694	29.1	52	81.1
	CEIP San Juan de Ribera - Valência(Set)	Público	17	17	14	0	1	0.82	5	0	1.5	4	4.5	1	2	2	4	0	0	4	3	Serunion	19			150	150	550	550	225	225	490	490	0	1.01942	41.2	42	83.2	Sru
	CEIP Azorin - Alicante (Nov)	Público	20	20	16	0	1	0.8	5	1	0.5	5	4.5	3	2	1	6	0	0	6	7		23	1 frango e 1 porco menos da metade cada um		75	75	540	575	265	275	685	685	2	1.54472	30.75	47.5	80
	Colegio Albufereta - Alicante (Out)	Público	21	21	19	0	1	0.9	4	1	2.5	4	3.5	1	4	2	3	0	0	9	6	Aramark	21			275	275	450	450	425	425	380	380		1.11014	34.5	38.3	72.8	Ar
	Colegio el Faro - Alicante (Out)	Público	22	22	21	0	1	0.95	6	1	2	5	3	2	2	7	5	0	0	15	12	Serunion	27			225	225	425	425	250	250	725	725	3	1.50169	29.5	44.3	73.8	Sru
	Colegio Sagrados Corazones - Alicante (Rot)	Concertado	25	24	23	1			7	3	2.5	4	1.5	4	6	4	6	1	0	5	2		32	1 frango e 1 coelho menos da metade e 1frango e 1 porco menos da metade		325	325	250	250	690	700	760	760	1	2.54783	23	58.6	81.6
	Colegio Liceo Corbí - Valencia (Out)	Concertado	23	23	20	0	1	0.87	6	4	0	5	2	4	6	2	5	0	0	11	5	Scolarest	28	(1 boi e 1 porco menos da metade)(1 boi e 1 frango menos da metade)		80	100	315	325	700	700	600	600	1	3.28488	17.2	56.5	73.7	Sco
	Colegio Nuestra Señora del Pilar - Valencia (Out)	Concertado	21	21	19	0	1	0.9	4	2	0	5	2	3	0	6	5	0	0	7	5	Serunion	23			50	50	325	325	75	75	700	700		2.06145	17.9	36.9	54.8	Sru
	Colegio Escolapias Valencia - Valência (Nov)	Concertado	20	20	19	0	1	0.95	10	3	3	3	8	2	1	5	4	0	0	7	5		29			375	375	875	875	150	150	565	565	1	0.572	62.5	35.75	98.3
	Colegio Sagrada Familia Silla - Valência (Nov)	Concertado	20	20	17	0	1	0.85	2	1	0.5	5	3.5	1	3	2	4	0	0	7	8	Serunion	20			75	75	475	475	325	325	490	490		1.48182	27.5	40.75	68.25	Sru
	Colegio Calasancio - Alicante (Out)	Concertado	21	21	19	0	1	0.9	7	2	1.5	4	2.5	1	5	2	7	0	0	6	5		25			200	200	350	350	525	525	820	820	0	2.44275	26.2	64	90.2
EXTREMADURA	C.E.I.P. EXTREMADURA - Caceres (Out)	Público	22	22	22	0	1	1	6	5	2.5	10	2.5	0	3	1	8	0	0	5	3		32	(2 porcos e 2 bois menos da metade)(1 porco e 1 peixe menos da metade)		355	375	480	500	300	300	905	905	1	1.30476	42	54.8	96.8
	CEIP Arias Montano - Badajoz (Out)	Público	22	22	22	0	1	1	4	0	3	4	2	1	6	2	8	0	0	10	2	Serunion	26			300	300	300	300	625	625	930	930	1	2.58974	27.3	70.7	98	Sru
	CEIP Juan Güell - Caceres (Out)	Público	22	22	19	0	1	0.86	3	0	1	3	2	0	6	1	9	0	0	12	4	Mediterranea	22			100	100	275	275	600	600	1015	1015	1	4.31765	17	73.4	90.4	M
	CEIP Juan Vázquez - Badajoz (Out)	Público	22	22	19	0	1	0.86	3	0	1	5	2	0	5	2	7	0	0	11	5	Mediterranea	22			100	100	325	325	500	500	820	820	1	3.10881	19.3	60	79.3	M
	CEIP San Andrés - Caceres (Out)	Público	22	22	19	0	1	0.86	3	0	1	3	2	0	6	1	9	0	0	12	4	Mediterranea	22			100	100	275	275	600	600	1015	1015	1	4.31765	17	73.4	90.4	M
	CEIP Enrique Segura Covarsí - Badajos (Out)	Público	22	22	17	0	1	0.77	3	1	1	1	3	1	5	0	8	0	0	7	5	Serunion	20			125	125	325	325	525	525	880	880	0	3.13235	20.4	63.9	84.3	Sru
	Colegio Diocesano José Luis Cotallo - Cáceres (Jun)	Concertado	20	20	19	0	1	0.95	9	10	2.5	5	1.5	4	2	0	6	0	0	7	4		31	(4 porcos e 4 frangos menos da metade)		500	500	235	275	260	300	660	660	1	1.2517	36.75	46	82.7
	Colegio Sagrado Corazón de Jesús - Cáceres (Maio)	Concertado	19	19	19	0	1	1	5	4	0.5	7	5.5	2	6	0	3	0	0	11	2		28	2 frangos,, 2 porcos e 2 bois menos de 1/3		120	150	695	725	620	650	330	330	0	1.1655	42.9	50	92.9
	Colegio Santo Ángel - Badajoz (Out)	Concertado	22	22	18	0	1	0.82	5	3	2	6	2	0	4	2	6	0	0	11	5		25			275	275	350	350	400	400	710	710	1	1.77465	28.4	50.4	78.8
	Salesianos “Ramón Izquierdo” - Badajoz (Out)	Concertado	22	22	22	0	1	1	8	2	3	11	4	4	2	0	6	0	0	7	4		32	2 porcos e 2 bois menos da metade		330	350	655	675	300	300	660	660	0	0.975391	44.7	43.6	88.3
GALICIA	CEIP Flavia - Padron (Out)	Público	22	22	22	0	1	1	14	1	2	10	3	1	5	9	5	0	0	9	8		36	1 peixe e 1 frango menos da metade		225	225	550	550	515	525	765	775	1	1.65057	35.2	58.1	93.3
	CEIP Rogelio García Yáñez, Galicia (Out)	Público	21	21	21	0	1	1	5	0	2	4	2	0	4	7	7	0	1	5	3		27			200	200	300	300	400	400	945	945	3	2.68908	23.8	64	87.8
ABR	CEP Doutor Fleming - Vigo (Abr)	Público	16	16	14	0	1	0.875	2	0	2	2	2	1	3	1	6	0	0	4	3	Aramark	17			200	200	250	250	325	325	685	685	3	2.24555	28.1	63.1	91.2	Ar
	CEIP Gregorio Sanz - Lugo (Mar)		18	18	18	0	1	1	2	1	3	3	2	1	2	3	7	0	0	15	7		22			325	325	275	275	225	225	845	845	2	1.78378	33.3	59.4	92.7
	CPI Camiño de Santiago - Galícia (Out)	Público	22	22	20	0	1	0.91	4	2	1	3	3	0	4	3	9	0	0	11	2		25	1 peixe e 1 porco menos da metade		150	150	365	375	400	400	1055	1065	1	2.82479	23.4	66.1	89.5
	CPI O Cruce - A Coruna (Out)	Público	22	22	21	0	1	0.95	8	1	3	3	3	2	3	8	6	0	0	9	8		29			325	325	375	375	350	350	860	860	2	1.72956	31.8	55	86.8
	Colegio Sagrado Corazon Franciscanas - A Coruna (Nov)	Concertado	19	19	17	0	1	0.89	7	2	1	5	2	0	5	4	5	0	0	7	13		24			150	150	325	325	500	500	650	650	3	2.42	25	60.5	85.5
	Colegio La Grande Obra de Atocha - A Coruña (Out)	Concertado	22	22	19	0	1	0.86	2	0	4	2	4	1	3	7	2	0	0	10	9		23	1 frango e 1 peixe menos da metade cada um		400	400	450	450	315	325	385	395	0	0.823834	38.6	31.8	70.6
	Colexio San Jorge - Santiago (Out)	Concertado	22	22	22	0	1	1	4	1	2	3	5	2	1	5	8	0	0	11	5		27	1 frango e 1 peixe menos da metade cada um		225	225	575	575	140	150	995	1005	3	1.41758	36.4	51.6	88
	Liceo La Paz, A Coruna (Out)	Concertado	19	19	19	0	1	1	5	0	3	4	3	1	4	3	6	0	0	5	4		24			300	300	400	400	425	425	735	735	2	1.65761	36.8	61	97.8
LA RIOJA	CEIP Eduardo González Gallarza - Lardero (OUT)	Público	22	22	18	0	1	0.82	4	0	0.5	2	3.5	1	5	1	9	0	0	8	5	Seral	22			50	50	400	400	525	525	1015	1015	2	3.43137	20.4	70	90.4	Sa
	CEIP El Arco - Logroño (Out)	Público	23	21	18	2	0.91	0.78	5	0	0.5	5	4.5	0	5	0	8	0	0	5	3	Mediterranea	23			50	50	575	575	500	500	880	880	0	2.21402	27.1	60	87.1	M
	CEIP La Guindalera - Logroño (Nov)	Público	20	19	16	1	0.95	0.8	4	0	0.5	5	2.5	0	5	1	6	0	0	4	4	Mediterranea	20			50	50	375	375	500	500	685	685	0	2.78824	21.25	59.25	80.5	M
	Colegio Escolapias Sotillo - Logrono (Out)	Concertado	23	23	18	0	1	0.78	4	0	0.5	2	3.5	1	5	1	9	0	0	9	6	Seral	22			50	50	400	400	525	525	1015	1015	2	3.43077	19.5	66.9	86.4	Sa
	Colegio Jesuitas - Logrono (Out)	Concertado	23	22	18	1	0.96	0.78	4	0	2	2	1	2	7	1	8	0	0	5	4	Serunion	23	1 porco e 1 peixe menos da metade		200	200	140	150	750	750	895	905	1	4.83108	14.8	71.5	86.3	Sru
MADRI	CEIP ALDEBARAN - Madri (Out)	Público	22	22	19	0	1	0.86	2	2	2.5	2	3.5	2	5	0	5	0	0	5	4	Scolarest	22	1 boi e 1 frango menos da metade		290	300	400	400	540	550	550	550	0	1.57971	31.3636	49.5455	80.9091	Sco
	CEIP Bilingüe Hernán Cortés - Madri (Out)	Público	23	23	22	0	1	0.96	4	0	3	3	4	1	4	4	7	0	0	12	13		26			300	300	475	475	425	425	870	870	1	1.67097	33.6957	56.3043	90
	CEIP Carlos V - Madri(Out)	Público	22	22	21	0	1	0.95	6	5	2	9	1	3	4	1	9	0	0	15	11		34	(2 bois, 2 frangos e 2 porcos menos de 1/3)(1 boi e 1 porco menos da metade)		285	325	285	325	445	475	1015	1015	0	2.5614	25.9091	66.3636	92.2727
	CEIP Las Artes - Madri (Out)	Público	22	22	22	0	1	1	9	5	1	6	3	1	6	4	7	0	0	4	3		33			225	225	450	450	625	625	870	870	2	2.21481	30.6818	67.9545	98.6364
	CEIP Madrid-Sur - Madri (Out)	Público	22	22	20	0	1	0.91	5	3	0	4	3	1	6	2	8	0	0	9	5		27	1 peixe e 1 porco menos da metade e (1 boi e 1 frango menos da metade)		65	75	390	400	615	625	920	930	3	3.37363	20.6818	69.7727	90.4545
	CEIP Pasamonte - Madri (Out)	Público	21	21	18	0	1	0.86	7	3	1.5	5	3.5	3	3	1	8	0	0	5	4		28			225	225	475	475	360	375	905	905	1	1.80714	33.3333	60.2381	93.5714
	CEIP Pinar del Rey - Madri (Out)	Público	22	22	20	0	1	0.91	7	4	2	7	2	2	4	4	7	0	0	8	5		32	(2 bois, 2 frangos e 2 porcos menos de 1/3)(1 peixe e 1 porco menos da metade)		270	300	335	375	420	450	860	870	2	2.1157	27.5	58.1818	85.6818
	CEIP Príncipe Felipe - Madrid (Out)	Público	21	20	18	1	0.95	0.86	5	2	1	6	2	2	4	1	8	0	0	6	10		26	1 boi, 1 porco e 1 frango menos de 1/3		135	150	335	350	435	450	905	905	0	2.85106	22.381	63.8095	86.1905
	CEIP Rosa Luxemburgo - Madri(Out)	Público	22	20	19	2	0.91	0.86	2	5	2	6	0	1	2	2	6	0	0	9	5	Aramark	24			325	325	150	150	225	225	710	710		1.96842	21.5909	42.5	64.0909	Ar
	Colegio Divino Maestro - Madrid (Out)	Concertado	22	22	18	0	1	0.82	5	4	2	4	2	2	5	0	7	0	0	7	5		26			300	300	300	300	550	550	770	770	0	2.2	27.2727	60	87.2727
	Colegio San Agustin - Madri(Out)	Concertado	22	22	18	0	1	0.82	7	3	1.5	3	5.5	2	5	0	5	0	0	10	6		25			225	225	625	625	445	550	550	550	0	1.17059	38.6364	45.2273	83.8636
	Colegio San Alfonso - Madri (Out)	Concertado	22	22	21	0	1	0.95	2	4	2.5	4	3.5	0	4	0	8	0	0	5	2		26			350	350	450	450	400	400	880	880	0	1.6	36.3636	58.1818	94.5455
	El Valle Sanchinaro - Madri(Out)	Concertado	22	22	19	0	1	0.86	3	0	1	4	4	1	5	1	7	0	0	4	6		23	1 porco e 1 frango menos da metade		100	100	490	500	515	525	795	795	2	2.22034	26.8182	59.5455	86.3636
	Stella Maris la Gavia - Madrid(Out)	Concertado	22	20	19	2	0.91	0.86	3	5	2	7	1	1	3	2	5	0	0	9	5	Aramark	26			325	325	275	275	325	325	600	600		1.54167	27.2727	42.0455	69.3182	Ar
MURCIA	CEIP San Miguel - Murcia (Rot)	Público	30	30	28	0	1	0.93	7	4	2	10	0	5	3	8	3	0	0	3	7		35			300	300	250	250	425	425	530	530		1.7377	18.3	31.8	50.1
	CEIP Santa María de Gracia - Murcia (Rot)	Público	30	29	29	1	0.97	0.97	3	2	2	10	1	3	2	9	3	0	0	12	17	Serunion	32			250	250	350	350	275	275	555	555		1.38	20	27.6	47.6	Sru
	Colegio Carmelitas Murcia - Murcia (Out)	Concertado	23	23	23	0	1	1	8	2	1	6	2	2	4	15	5	0	0	13	14	Serunion	37			150	150	350	350	450	450	925	925	2	2.75576	21.7	59.8	81.5	Sru
	Colegio Concertado Bilingüe Las Claras de la Flota - Murcia(Out)	Concertado	23	23	22	0	1	0.96	7	6	1	5	2	1	6	3	5	0	0	6	4	Scolarest	29			250	250	325	325	625	625	625	625	1	2.172	25	54.3	79.3	Sco
	Colegio Concertado Reina Sofía - Murcia (Rot)	Concertado	30	30	29	0	1	0.97	15	2	0	8	9	6	4	11	6	0	0	16	5		46	1 porco e 1 peixe menos da metade		50	50	1090	1100	550	550	925	935	2	1.29211	38	49.1	87.1
	Colegio San Jorge - Murcia (Rot)	Concertado	30	30	27	0	1	0.9	7	3	5	11	0	3	2	9	3	0	0	5	8		36			575	575	275	275	275	275	555	555		0.977385	28.3	27.66	55.96
	Colegio Vedruna - Cartagena (Out)	Concertado	23	23	22	0	1	0.96	9	2	1	5	6	1	2	13	5	0	0	14	16	Serunion	35			150	150	725	725	225	225	875	875	3	1.25789	38	47.8	85.8	Sru
NAVARRA	C.P. BUZTINTXURI - Navarra (Out)	Público	22	20	17	2	0.91	0.77	0	0	2	4	2	1	4	0	4	1	0	5	3	Ausolan	18	1 coelho e 1 porco menos da metade		200	200	290	300	440	425	440	440		1.79372	22.3	40	62.3	Au
	CEIP Principe de Viana Olite - Navarra (Out)	Público	23	19	17	4	0.83	0.74	0	0	2	2	1	2	3	0	7	0	0	5	2	Ausolan	17			200	200	150	150	350	350	770	770		3.20395	15.2	48.7	63.9	Au
	Colegio Claret Larraona - Pamplona (out)	Concertado	22	21	19	1	0.95	0.86	7	0	1	6	2	3	5	3	6	0	0	14	6		26			100	100	350	350	575	575	735	735	0	2.91667	20.4	59.5	79.9
	Colegio Luis Amigó - Navarra (Out)	Concertado	23	23	22	0	1	0.96	15	2	2	5	3	0	6	15	5	0	0	9	29		38			250	250	425	425	600	600	925	925	0	2.2628	29.3	66.3	95.6
	Colegio Santa Catalina Labouré - Navarra (Out)	Concertado	23	20	15	3	0.87	0.65	1	1	1	2	1	0	3	1	8	0	0	8	5	Aramark	17			125	125	150	150	300	300	905	905		4.38182	11.9565	52.3913	64.3478	Ar
	Colegio Vedruna - Pamplona (Out)	Concertado	23	22	19	1	0.96	0.83	0	0	2	5	2	1	3	0	6	1	0	0	3	Ausolan	20	1 coelho e 1 porco menos da metade		200	200	315	325	340	325	660	660		1.94175	22.3913	43.4783	65.8696	Au
	Colegio Sagrado Corazon - Navarra (Out)	Concertado	23	23	23	0	1	1	4	1	2	3	4	0	6	1	10	0	0	10	0		27			225	225	475	475	600	600	1125	1125	0	2.46429	30.4348	75	105.435
PAÍS BASCO	CEIP AMARA-BERRI -País Basco (deciembre)	Público	16	15	15	1	0.94	0.94	3	0	2.5	4	1.5	2	2	0	6	0	0	4	3		18			250	250	250	250	250	250	660	660	1	1.82	31.25	56.875	88.125
	CEIP AMOREBIETA-LARREA - País Basco (octubre)	Público	23	22	18	1	0.96	0.78	5	1	4	6	1	1	4	0	7	0	0	4	5		24			425	425	250	250	425	425	770	770	1	1.77037	29.3478	51.9565	81.3043
	CEIP ANAITASUNA IKASTOLA - País Basco (octubre)	Público	23	22	20	1	0.96	0.87	3	0	4	4	1	1	5	0	8	0	0	5	5		23			400	400	200	200	525	525	880	880	0	2.34167	26.087	61.087	87.1739
	CEIP ARANGOITI - País Basco (octubre)	Público	23	22	20	1	0.96	0.87	3	0	4	4	1	1	5	0	8	0	0	5	5		23			400	400	200	200	525	525	880	880	1	2.34167	26.087	61.087	87.1739
	CEIP CERVANTES - País Basco (noviembre)	Público	20	19	17	1	0.95	0.85	5	2	4	5	1	1	2	1	7	0	0	4	4		23			450	450	225	225	225	225	795	795	1	1.51111	33.75	51	84.75
	CEIP Mendiola LHI - País Basco (Junio)	Público	15	14	13	1	0.93	0.87	1	2	3	4	0	0	1	1	4	0	0	3	4		15			350	350	100	100	100	100	465	465		1.25556	30	37.6667	67.6667
	Berrio Otxoa - País Basco (Out)	Concertado	23	22	19	1	0.96	0.83	3	4	1	6	2	0	3	0	8	0	0	6	4		24			200	200	350	350	300	300	880	880	0	2.14545	23.913	51.3043	75.2174
	Colegio Gaztelueta - País Basco (Out)	Concertado	22	21	20	1	0.95	0.91	4	2	3	4	2	0	6	2	7	0	0	10	5		26			350	350	300	300	600	600	820	820	0	2.18462	29.5455	64.5455	94.0909
	Colegio Ntra. Sra. de la Merced - País Basco (Out)	Concertado	22	22	19	0	1	0.86	0	1	6	2	2	0	2	0	6	0	0	10	4		19			625	625	250	250	200	200	660	660	0	0.982857	39.7727	39.0909	78.8636
																				7.52761	6.59509															146 vermelhos nessa coluna
																																				87,7% dos colegios
																																					81 vermelhos nessa coluna
																							CATERINGS						NÃO CATERINGS
																							M - 12	4	8				15	81
																							Ar - 13	5	7				0.156	0.844
																							Sa - 6	0	6
																							Sru - 20	4	14
																							Au - 10	4	5
																							Sco - 6	2	3
																							67	19	48
																								0.284	0.716
																								59 dos 67 menus ultrapassaram o adequado na categoria bife e porco. Isso significa 88% dos menus analisados.
																																Públicos (91)	Concertados (72)
																							CATERINGS									18	16
																							M Público	3	8							73	56
																							M Concertado	1	0
																							Ar Público	4	4
																							Ar Concertado	2	3
																							Sa Público	0	1
																							Sa Concertado	0	5
																							Sru Público	1	9
																							Sru Concertado	3	7
																							Au Público	3	3
																							Au Concertado	2	2
																							Sco Público	0	1
																							Sco Concertado	2	3

## Sheet: CO2e calculations
Total beef/pork day/grams	Proportion beef/pork		Amount beef	Amount pork	Total 4 meats day/grams	Total poultry/fish (day/grams)	Proportion poultry/fish		Amount Poultry (day)	Amount Fish (day)		Total Emissions 4 meats day/grams					Excess emissions days/grams (proportion 3/7)	Excess emissions year/kg	Average emissions sample
36.3	0.22		7.94	28.36	92.4	56.1	0.43		23.85	32.25		1813.95					587.95	102.891	103.276
15	0.42		6.25	8.75	72.75	57.75	0.17		10	47.75		1478.99					252.995	44.2741
12.5	0		0	12.5	64.7	52.2	0.53		27.77	24.43		760.946					-465.054	-81.3845	Me P
16.25	0.38		6.25	10	53.25	37	0.37		13.75	23.25		1197.46					-28.54	-4.9945	Me P
25	0.43		10.87	14.13	72.4	47.4	0.5		23.92	23.48		1811.41					585.411	102.447
29.25	0.43		12.5	16.75	88.25	59	0.35		20.5	38.5		2176.78					950.783	166.387
5	0		0	5	60	55	0.32		17.5	37.5		745.4					-480.6	-84.105	P
4.3	0		0	4.3	62.8	58.5	0.35		20.66	37.84		772.606					-453.394	-79.3439	C
10.4	0.6		6.28	4.12	61.5	51.1	0.21		10.65	40.45		1331.9					105.901	18.5326
22.7	0.35		7.95	14.76	80.2	57.5	0.16		9.09	48.41		1722.11					496.108	86.8189
20.4	0.39		7.93	12.47	89.3	68.9	0.25		17.05	51.85		1817.38					591.381	103.492
17.4	0.25		4.35	13.05	102.1	84.7	0.37		31.49	53.21		1629.44					403.442	70.6024
30.9	0.38		11.88	19.02	80.2	49.3	0.31		15.48	33.82		2029.71					803.713	140.65
38.8	0.21		8.31	30.49	86.9	48.1	0.4		19.46	28.64		1784.44					558.444	97.7277
34	0.17		5.67	28.33	83.8	49.8	0.14		6.82	42.98		1565.92					339.925	59.4868
25	0.05		1.19	23.81	82.6	57.6	0.43		24.99	32.61		1102.61					-123.392	-21.5936	Ar P
33.3	0.39		13.08	20.22	95.7	62.4	0.44		27.39	35.01		2297.63					1071.63	187.536
11.9	0.5		5.95	5.95	69.5	57.6	0.43		24.99	32.61		1356.28					130.276	22.7983
21.4	0.28		5.94	15.46	95.4	74	0.35		26.17	47.83		1691.44					465.445	81.4528
33.3	0.18		5.95	27.35	86.2	52.9	0.34		17.87	35.03		1582.42					356.42	62.3736
14.7	0.62	BOI	9.05	5.65	87	72.3	0.38		27.28	45.02		1852.72					626.722	109.676
22.7	0.25		5.68	17.03	68.6	45.9	0.32		14.77	31.13		1344.77					118.767	20.7843
48.75	0.26		12.5	36.25	95.5	46.75	0.21		10	36.75		2289.34					1063.34	186.085
8	0.86		6.86	1.14	56.9	48.9	0.47		22.74	26.16		1277.47					51.4708	9.00739
32.9	0.52	BOI	17.11	15.79	82.4	49.5	0.26		12.64	36.86		2523.64					1297.64	227.086
27.2	0.24		6.53	20.67	80.2	53	0.35		18.46	34.54		1557.03					331.033	57.9307
23.9	0.29		6.83	17.07	83.2	59.3	0.33		19.31	39.99		1625.23					399.233	69.8659
27.2	0.24		6.53	20.67	80.2	53	0.35		18.46	34.54		1557.03					331.033	57.9307
32.95	0.21		6.82	26.13	78.3	45.4	0.45		20.43	24.97		1542.1					316.099	55.3173
11.5	0.15		1.74	9.76	83	71.5	0.39		27.82	43.68		1163.18					-62.8174	-10.993	P
11.5	0.15		1.74	9.76	83	71.5	0.39		27.82	43.68		1163.18					-62.8174	-10.993	P
19.5	0.22		4.33	15.17	89.3	69.8	0.44		30.44	39.36		1454.41					228.411	39.9719
19.6	0.5		9.8	9.8	90	70.4	0.43		30.42	39.98		1940.71					714.715	125.075
13.6	0.42		5.67	7.93	92.5	79.1	0.43		33.87	45.23		1612.45					386.452	67.629
25.4	0.34		8.68	16.72	76.7	51.3	0.44		22.61	28.69		1683.51					457.515	80.0651
26.2	0.41		10.72	15.48	90.7	64.5	0.31		20.23	44.27		2060.05					834.055	145.96
24.6	0		0	24.6	86.6	62	0.46		28.28	33.72		1041.55					-184.447	-32.2782	P
17.2	0.39		6.75	10.45	57.6	40.4	0.5		20.2	20.2		1274.83					48.8295	8.54516
15.5	0.5		7.75	7.75	58.8	43.3	0.45		19.43	23.87		1383.49					157.495	27.5616
23.5	0.6	BOI	14	9.5	61.2	37.75	0.35		13.25	24.5		1974.38					748.377	130.966
13.4	0.53		7.04	6.36	74.3	60.9	0.53		32.5	28.4		1486.5					260.498	45.5871
31.3	0.35		10.86	20.44	71.3	50	0.46		22.83	27.17		1927.63					701.628	122.785
18	0.12		2.17	15.83	68.6	50.6	0.42		21.28	29.32		1020.4					-205.596	-35.9793	C
12.25	0.27		3.25	9	66.25	54	0.57		30.75	23.25		1054.5					-171.5	-30.0125	Sco C
22.7	0.25		5.68	17.03	73.6	50.9	0.3		15.23	35.67		1411.19					185.188	32.4079
29.1	0.19		5.54	23.56	86.6	57.5	0.34		19.44	38.06		1551.77					325.773	57.0103
25	0.3		7.61	17.39	83	58	0.49		28.24	29.76		1655.47					429.471	75.1575
12.5	0.33		4.17	8.33	74.7	62.2	0.31		19.44	42.76		1292.07					66.0655	11.5615
26.4	0.16		4.17	22.23	83.9	57.5	0.34		19.44	38.06		1399.11					173.113	30.2949
17.2	0.64	BOI	10.95	6.25	85.6	68.4	0.3		20.3	48.1		2022.21					796.207	139.336
29.2	0.57	BOI	16.69	12.51	95.6	66.4	0.33		22.23	44.17		2635.77					1409.77	246.709
29.2	0.43		12.51	16.69	86.6	59.4	0.28		16.65	42.75		2196.97					970.967	169.919
39.3	0.48		19.05	20.25	96.7	57.4	0.27		15.48	41.92		2868.53					1642.53	287.443
35.7	0.53	BOI	19.04	16.66	93.1	57.4	0.27		15.48	41.92		2823.34					1597.34	279.535
35.7	0.53	BOI	19.04	16.66	93.1	57.4	0.27		15.48	41.92		2823.34					1597.34	279.535
30.9	0.27		8.32	22.58	77.8	46.9	0.3		14.28	32.62		1691.19					465.188	81.4078
38.2	0.54	BOI	20.57	17.63	96.7	58.6	0.2		11.78	46.82		3017.75					1791.75	313.557
36.25	0.28		10	26.25	75.75	39.5	0.44		17.5	22		1790.52					564.523	98.7914
23.8	0.4		9.52	14.28	84.3	60.5	0.39		23.82	36.68		1857.89					631.888	110.58
42.1	0.53	BOI	22.37	19.73	102.6	60.5	0.52		31.57	28.93		3174.16					1948.16	340.927
38.25	0.46		17.5	20.75	88.75	50.5	0.22		11.25	39.25		2642.35					1416.35	247.861
35.9	0.26		9.37	26.53	91.2	55.3	0.25		14.06	41.24		1959.59					733.585	128.377
23.9	0.52	BOI	12.52	11.38	82.5	58.6	0.23		13.63	44.97		2133.05					907.047	158.733
20.9	0.33		6.97	13.93	77	56.1	0.3		16.66	39.44		1566.86					340.855	59.6497
23.9	0.52	BOI	12.52	11.38	82.5	58.6	0.23		13.63	44.97		2133.05					907.047	158.733
11.4	0.2		2.28	9.12	80.3	68.9	0.3		20.47	48.43		1201.22					-24.7786	-4.33626	P
12.5	0.11		1.39	11.11	84.4	71.9	0.33		23.6	48.3		1166.3					-59.6977	-10.4471	P
21.05	0.13		2.63	18.42	89.2	68.15	0.39		26.31	41.84		1318.34					92.3415	16.1598
16.9	0.37		6.19	10.71	68.3	51.4	0.49		25.22	26.18		1353.38					127.376	22.2908
32.5	0.58	BOI	18.79	13.71	92.7	60.2	0.34		20.22	39.98		2782.5					1556.5	272.387
19.8	0.25		5	14.8	73.3	53.5	0.55		29.48	24.02		1297.95					71.9482	12.5909
17.7	0.06		1.13	16.57	57.7	40	0.47		18.86	21.14		790.676					-435.324	-76.1818	Me P
20	0.5		10	10	60.25	40.25	0.53		21.25	19		1586.61					360.608	63.1063
18.2	0.38		6.83	11.38	72.1	53.9	0.42		22.74	31.16		1468.69					242.691	42.4709
25	0.39		9.78	15.22	66.3	41.3	0.42		17.39	23.91		1657.81					431.805	75.5659
23.9	0.59	BOI	14.12	9.78	69.8	45.9	0.66		30.45	15.45		2036.17					810.174	141.781
33.3	0.6	BOI	19.98	13.32	92.3	59	0.25		15	44		2899.35					1673.35	292.836
29.5	0.46		13.62	15.88	77.9	48.4	0.56		27.27	21.13		2107.56					881.557	154.273
22.7	0.05		1.14	21.57	54.7	32	0.53		17.02	14.98		751.099					-474.901	-83.1077	Ar C
28.2	0.23		6.51	21.69	78.9	50.7	0.56		28.29	22.41		1499.29					273.289	47.8256
7.1	0.85		6.02	1.08	67.5	60.4	0.57		34.33	26.07		1306.34					80.3356	14.0587
32.8	0.3		9.77	23.03	90.8	58	0.34		19.77	38.23		1971.62					745.624	130.484
46.6	0.22		10.23	36.37	92.7	46.1	0.57		26.12	19.98		1995.53					769.527	134.667
17	0.4		6.8	10.2	78.2	63.4	0.43		27.27	36.13		1563.63					337.633	59.0857
25	0.45		11.36	13.64	78	53	0.54		28.43	24.57		1913.49					687.494	120.312
26.2	0.23		5.95	20.25	90.2	64	0.37		23.79	40.21		1624.05					398.053	69.6593
26.2	0.41		10.72	15.48	72.6	46.4	0.26		11.9	34.5		1844.67					618.672	108.268
29	0.21		6.18	22.82	88.3	59.3	0.34		20.24	39.06		1627.86					401.857	70.325
18.6	0.26		4.77	13.83	81	62.4	0.34		21.44	40.96		1414.66					188.664	33.0163
25	0		0	25	82.6	57.6	0.43		24.99	32.61		998.876					-227.124	-39.7468	Ar P
29.1	0.23		6.82	22.28	81.1	52	0.5		25.89	26.11		1564.13					338.134	59.1735
41.2	0.21		8.83	32.37	83.2	42	0.31		13.22	28.78		1799.64					573.636	100.386
30.75	0.12		3.75	27	80	47.5	0.28		13.25	34.25		1303.03					77.025	13.4794
34.5	0.38		13.09	21.41	72.8	38.3	0.53		20.22	18.08		2011.75					785.752	137.507
29.5	0.35		10.21	19.29	73.8	44.3	0.26		11.36	32.94		1814.25					588.246	102.943
23	0.57	BOI	13	10	81.6	58.6	0.48		27.89	30.71		2110.19					884.192	154.734
17.2	0.2		3.48	13.72	73.7	56.5	0.54		30.42	26.08		1170.8					-55.2006	-9.6601	Sco C
17.9	0.13		2.39	15.51	54.8	36.9	0.1		3.57	33.33		918.209					-307.791	-53.8634	Ser C
62.5	0.3		18.75	43.75	98.3	35.75	0.21		7.5	28.25		2862.89					1636.89	286.455
27.5	0.14		3.75	23.75	68.25	40.75	0.4		16.25	24.5		1159.73					-66.265	-11.5964	Ser C
26.2	0.36		9.53	16.67	90.2	64	0.39		24.98	39.02		1931.65					705.647	123.488
42	0.38		16.12	25.88	96.8	54.8	0.25		13.64	41.16		2617.84					1391.84	243.572
27.3	0.5		13.65	13.65	98	70.7	0.4		28.42	42.28		2382.72					1156.72	202.425
17	0.27		4.53	12.47	90.4	73.4	0.37		27.27	46.13		1502.06					276.057	48.31
19.3	0.24		4.54	14.76	79.3	60	0.38		22.73	37.27		1365.67					139.67	24.4423
17	0.27		4.53	12.47	90.4	73.4	0.37		27.27	46.13		1502.06					276.057	48.31
20.4	0.28		5.67	14.73	84.3	63.9	0.37		23.88	40.02		1526.55					300.546	52.5956
36.75	0.68	BOI	25	11.75	82.7	46	0.28		13	33		3209.74					1983.74	347.155
42.9	0.15		6.32	36.58	92.9	50	0.65		32.63	17.37		1637.82					411.825	72.0693
28.4	0.44		12.5	15.9	78.8	50.4	0.36		18.16	32.24		2057.9					831.899	145.582
44.7	0.34		14.98	29.72	88.3	43.6	0.31		13.63	29.98		2399.22					1173.22	205.313
35.2	0.29		10.22	24.98	93.3	58.1	0.4		23.38	34.72		2028.18					802.184	140.382
23.8	0.4		9.52	14.28	83.1	64	0.24		15.42	48.58		1937.18					711.177	124.456
28.1	0.44		12.49	15.61	91.2	63.1	0.32		20.3	42.8		2218.39					992.389	173.668
33.3	0.54	BOI	18.04	15.26	92.7	59.4	0.21		12.49	46.91		2745.13					1519.13	265.848
23.4	0.29		6.82	16.58	89.5	66.1	0.27		18.17	47.93		1715.18					489.177	85.606
31.8	0.46		14.76	17.04	86.8	55	0.29		15.91	39.09		2367.92					1141.92	199.835
25	0.32		7.89	17.11	85.5	60.5	0.43		26.3	34.2		1721.25					495.248	86.6685
38.6	0.47		18.16	20.44	70.6	31.8	0.45		14.31	17.49		2437.8					1211.8	212.065
36.4	0.28		10.24	26.16	88	51.6	0.12		6.36	45.24		2020.1					794.099	138.967
36.8	0.43		15.77	21.03	97.8	61	0.37		22.35	38.65		2575.07					1349.07	236.088
20.4	0.11		2.27	18.13	90.4	70	0.34		23.86	46.14		1313.39					87.3863	15.2926
27.1	0.08		2.17	24.93	87.1	60	0.36		21.74	38.26		1258.82					32.8175	5.74306
21.25	0.12		2.5	18.75	80.5	59.25	0.42		25	34.25		1193.09					-32.91	-5.75925	Me P
19.5	0.11		2.17	17.33	86.4	66.9	0.34		22.81	44.09		1255.29					29.2853	5.12493
14.8	0.59	BOI	8.71	6.09	86.3	71.5	0.46		32.6	38.9		1793.41					567.408	99.2963
31.36	0.42		13.18	18.18	80.91	49.55	0.5		24.55	25		2118					892.001	156.1
33.7	0.39		13.05	20.65	90	56.3	0.33		18.48	37.82		2250.3					1024.3	179.252
25.91	0.5		12.96	12.96	92.27	66.36	0.3		20.23	46.13		2277.22					1051.22	183.964
30.68	0.33		10.23	20.45	98.64	67.95	0.42		28.41	39.54		2088.76					862.757	150.982
20.68	0.14		2.95	17.73	90.45	69.77	0.4		27.95	41.82		1357.6					131.595	23.0292
33.33	0.32		10.71	22.62	93.57	60.24	0.28		17.14	43.1		2100.51					874.508	153.039
27.5	0.45		12.27	15.23	85.68	58.18	0.33		19.09	39.09		2129.32					903.316	158.08
22.38	0.29		6.43	15.95	86.19	63.81	0.32		20.71	43.1		1627.86					401.862	70.3258
21.59	0.68	BOI	14.77	6.82	64.09	42.5	0.24		10.23	32.27		2094.08					868.084	151.915
27.27	0.5		13.64	13.64	87.27	60	0.42		25	35		2248.62					1022.62	178.958
38.64	0.36		10.22	28.4	83.86	45.23	0.5		25	25		1953.79					727.79	127.363
36.36	0.44		15.91	20.45	94.55	58.18	0.31		18.18	40		2559.1					1333.1	233.293
26.82	0.17		4.55	22.27	86.36	59.55	0.39		23.41	36.14		1450.42					224.423	39.274
27.27	0.54	BOI	14.77	12.5	69.32	42.05	0.35		14.77	27.28		2140.8					914.801	160.09
18.3	0.55		9.98	8.32	50.1	31.8	0.45		14.15	17.65		1475.46					249.46	43.6554
20	0.42		8.33	11.67	47.6	27.6	0.33		9.14	18.46		1314.15					88.1477	15.4258
21.7	0.3		6.51	15.19	81.5	59.8	0.33		19.57	40.23		1576.09					350.095	61.2665
25	0.43		10.87	14.13	79.3	54.3	0.5		27.15	27.15		1893.31					667.313	116.78
38	0.04		1.67	36.33	87.1	49.1	0.37		18.31	30.79		1213.74					-12.2587	-2.14527	C
28.3	0.68	BOI	19.14	9.16	55.96	27.66	0.33		9.16	18.5		2359.37					1133.37	198.34
38	0.17		6.51	31.49	85.8	47.8	0.2		9.78	38.02		1650					423.998	74.1996
22.3	0.41		9.1	13.2	62.3	40	0.5		20	20		1537.76					311.76	54.558
15.2	0.57		8.69	6.51	63.9	48.7	0.31		15.22	33.48		1551.17					325.173	56.9053
20.4	0.22		4.53	15.87	79.9	59.5	0.44		26.12	33.38		1358.78					132.778	23.2361
29.3	0.37		10.85	18.45	95.6	66.3	0.39		26.09	40.21		2112.05					886.048	155.058
11.96	0.45		5.44	6.52	64.35	52.39	0.25		13.04	39.35		1286.48					60.4777	10.5836
22.39	0.39		8.7	13.69	65.87	43.48	0.34		14.78	28.7		1571.06					345.06	60.3854
30.43	0.32		9.78	20.65	105.43	75	0.35		26.09	48.91		2151.27					925.267	161.922
31.25	0.5		15.63	15.63	88.13	56.88	0.29		16.73	40.15		2459.65					1233.65	215.888
29.35	0.63	BOI	18.48	10.87	81.3	51.96	0.36		18.48	33.48		2610.93					1384.93	242.363
26.09	0.67	BOI	17.39	8.7	87.17	61.09	0.37		22.83	38.26		2583.87					1357.87	237.627
26.09	0.67	BOI	17.39	8.7	87.17	61.09	0.37		22.83	38.26		2583.87					1357.87	237.627
33.75	0.67	BOI	22.5	11.25	84.75	51	0.22		11.25	39.75		3029.62					1803.62	315.633
30	0.78	BOI	23.33	6.67	67.67	37.67	0.18		6.67	31		2891.34					1665.34	291.434
23.91	0.36		8.69	15.22	75.22	51.3	0.25		13.04	38.26		1702.03					476.028	83.3049
29.55	0.54	BOI	15.91	13.64	94.09	64.55	0.42		27.27	37.28		2527.92					1301.92	227.835
39.77	0.71	BOI	28.41	11.36	78.86	39.09	0.23		9.09	30		3464.69					2238.69	391.77
